# Supplementary material
Source: MDPI journal article supplement (https://www.mdpi.com/2075-4701/8/11/919)
Supplement: s1 [file s1]

# Supplementary material

Table S1. List of samples and dealloying conditions examined in this work.

| Sample composition                                                                                                                                                                                                   | Microstructure                  | Dealloying solutions                                                              | Immersion times                                         |
|----------------------------------------------------------------------------------------------------------------------------------------------------------------------------------------------------------------------|---------------------------------|-----------------------------------------------------------------------------------|---------------------------------------------------------|
| Cu <sub>55</sub> Mg <sub>5</sub> Ca <sub>40</sub> , Cu <sub>60</sub> Mg <sub>10</sub> Ca <sub>30</sub> ,<br>Cu <sub>54.5</sub> Mg <sub>18.2</sub> Ca <sub>27.3</sub>                                                 | Amorphous+<br>CaCu <sub>5</sub> | 1 M HCl<br>Distilled water<br>0.1 M NaOH                                          | 24h, 3days<br>24h, 3days<br>24h, 3days, 7days           |
| Cu <sub>30</sub> Mg <sub>25</sub> Ca <sub>45</sub> , Cu <sub>35</sub> Mg <sub>25</sub> Ca <sub>40</sub> ,<br>Cu <sub>40</sub> Mg <sub>25</sub> Ca <sub>35</sub> , Cu <sub>45</sub> Mg <sub>25</sub> Ca <sub>30</sub> | >90%<br>amorphous               | 1 M HCl<br>Distilled water<br>0.1 M NaOH<br>0.04 M H <sub>2</sub> SO <sub>4</sub> | 24h, 3days<br>24h, 3days<br>24h, 3days, 7days<br>30 min |
| Cu <sub>55</sub> Mg <sub>25</sub> Ca <sub>20</sub> , Cu <sub>60</sub> Mg <sub>25</sub> Ca <sub>15</sub> ,<br>Cu <sub>45.5</sub> Mg <sub>45.5</sub> Ca <sub>9</sub>                                                   | Crystalline                     | Not dealloyed                                                                     |                                                         |
